# Supplementary material
Source: publisher figshare collection journal article supplement (https://diabetesjournals.figshare.com/ndownloader/files/23235908)
Supplement: Supplementary file 1 [file 23235908]

**Supplementary Table 1. Sensitivity Analyses for the Primary Outcome and Selected Secondary Outcomes**

|  | **Control**  **(N=20 meals) a** | **Low Dose Afrezza**  **(N=22 meals)** | **High Dose Afrezza**  **(N=22 meals)** | **P-Value for Control vs. Low Dose Afrezza** | **P-Value for Control vs. High Dose Afrezza** |
| --- | --- | --- | --- | --- | --- |
| **Peak Postprandial Glucose Level (mg/dL) *mean ± SD*** | 192 ± 54 | 221 ± 57 | 199 ± 43 | 0.06 | 0.81 |
| Mean Glucose (mg/dL) *median (quartiles)* | 143 (120, 174) | 151 (127, 190) | 132 (108, 153) | 0.15 | 0.56 |
| % Time in Target Range (70-180 mg/dL) *median (quartiles)* | 79% (48%, 100%) | 75% (45%, 94%) | 76% (57%, 92%) | 0.40 | 0.81 |
| **Up to three hours after the Start of the Meal** |  |  |  |  |  |
| Peak Postprandial Glucose Level (mg/dL)*mean ± SD* | 182 ± 50 | 208 ± 55 | 191 ± 49 | 0.05 | 0.50 |
| Mean Glucose (mg/dL) *median (quartiles)* | 127 (107, 157) | 153 (130, 195) | 132 (105, 177) | 0.24 | 0.70 |
| % Time in Target Range (70-180 mg/dL) *median (quartiles)* | 84% (60%, 98%) | 79% (39%, 100%) | 82% (54%, 93%) | 0.45 | 0.92 |
| **Up to the Start of the Next Meal** |  |  |  |  |  |
| Peak Postprandial Glucose Level (mg/dL)*mean ± SD* | 185 ± 50 | 208 ± 54 | 195 ± 46 | 0.04 | 0.45 |
| Mean Glucose (mg/dL) *median (quartiles)* | 130 (109, 145) | 152 (132, 177) | 134 (121, 169) | 0.17 | 0.60 |
| % Time in Target Range (70-180 mg/dL) *median (quartiles)* | 83% (63%, 97%) | 80% (47%, 100%) | 84% (61%, 94%) | 0.44 | 0.98 |

a CGM analyses included an additional two meals in the control arm because they had enough CGM data to be included.
